# Supplementary material
Source: PubMed Central journal article supplement (PMC4053174)

# Supplemental Figure 1

A

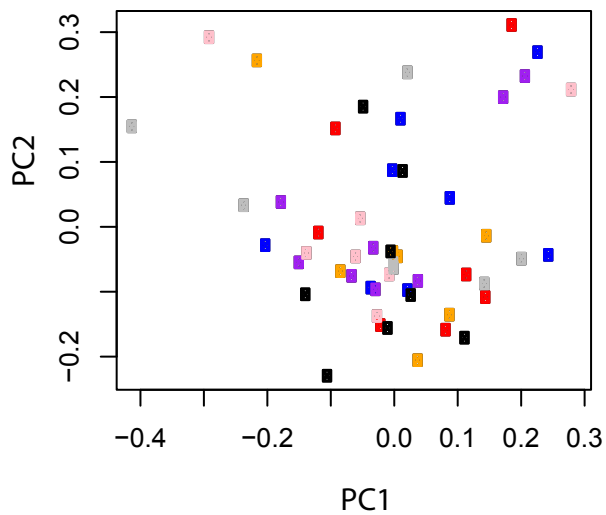

B

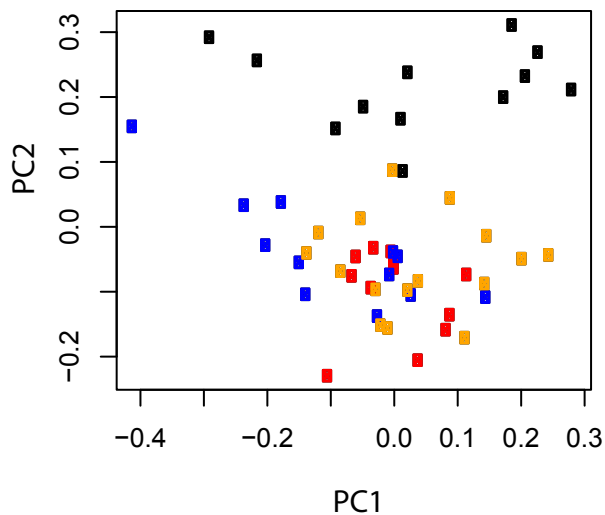

Supplement: NIHMS407329-supplement-3.pdf [file NIHMS407329-supplement-3.pdf]

Supplemental Figure 2

A

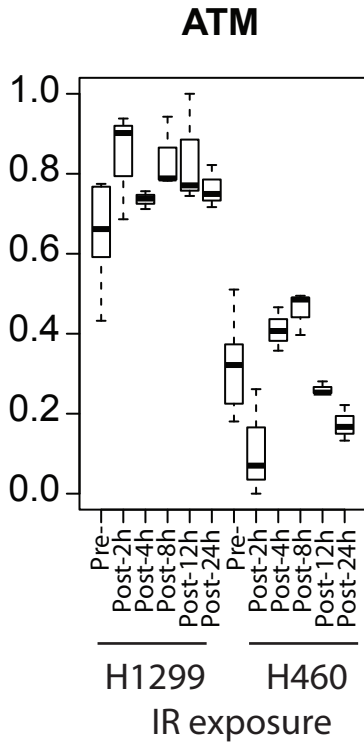

B

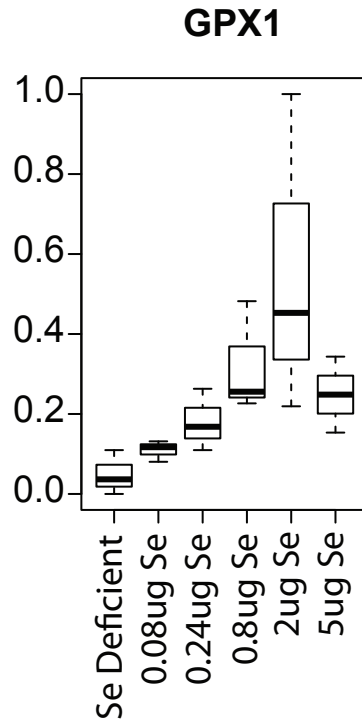

C

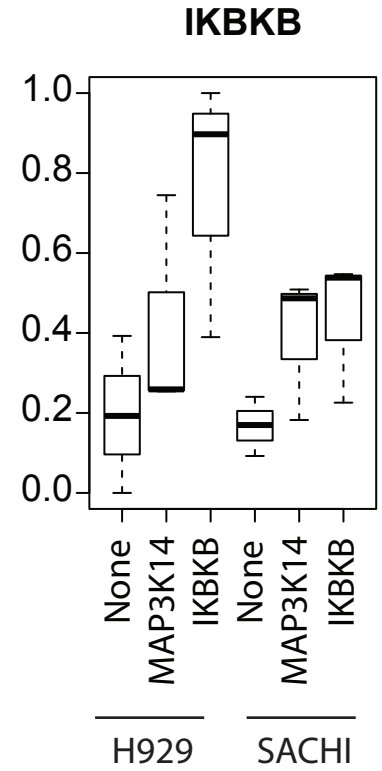

D

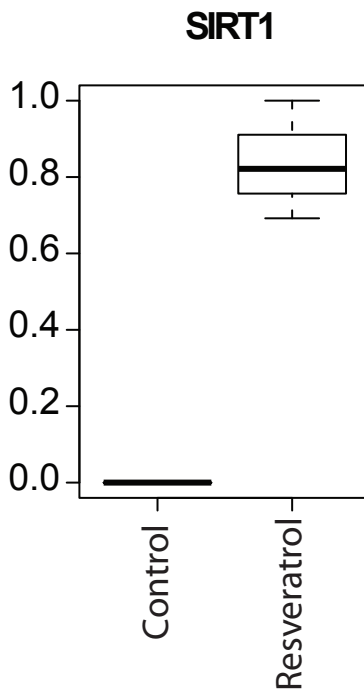

E

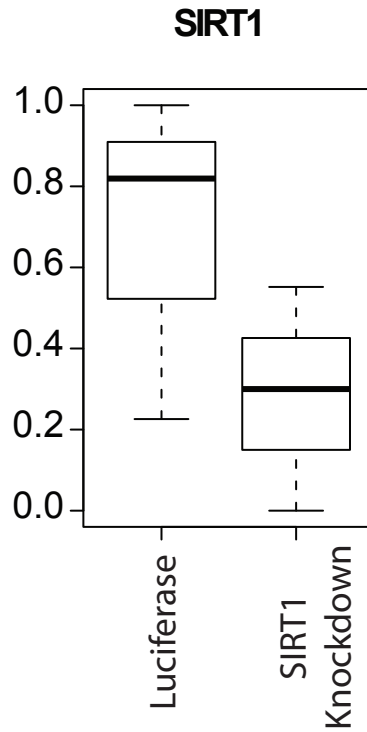

F

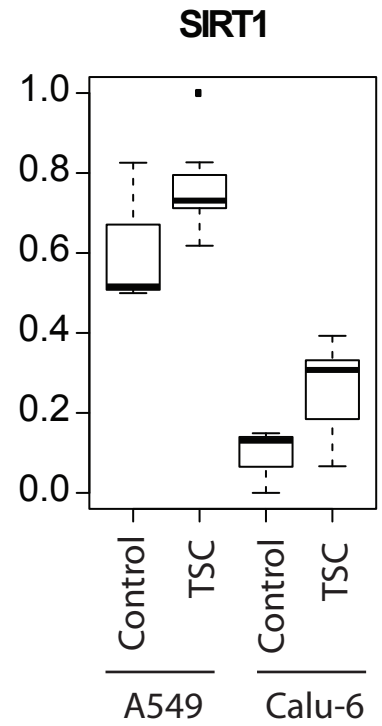

Supplement: NIHMS407329-supplement-4.pdf [file NIHMS407329-supplement-4.pdf]

# Supplemental Figure 3

A. GSE20549

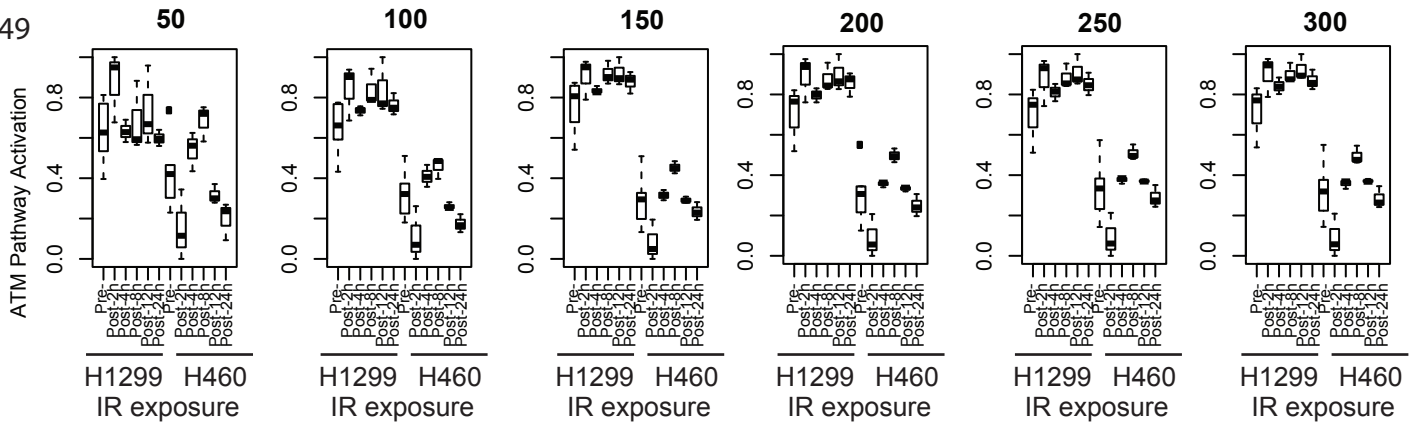

B. GSE23895

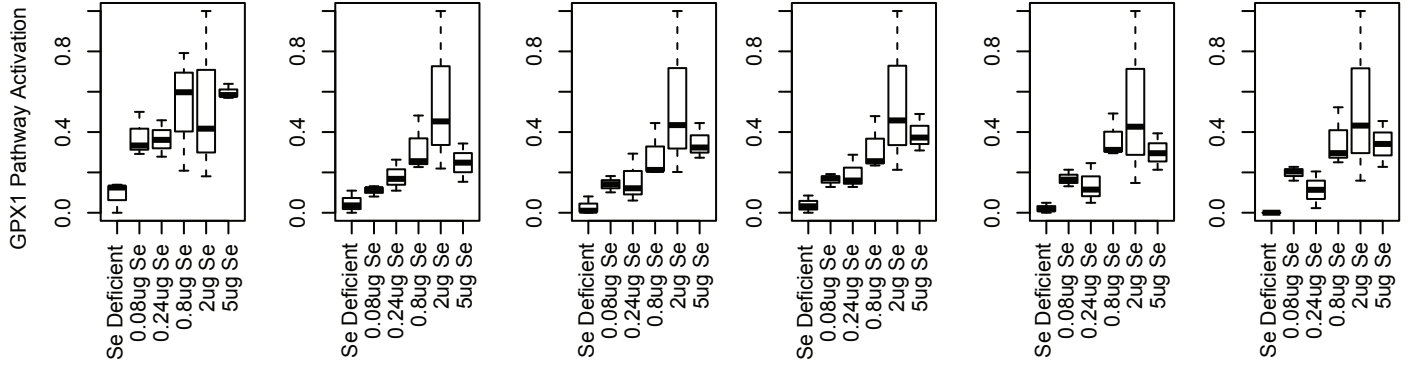

C. GSE18047

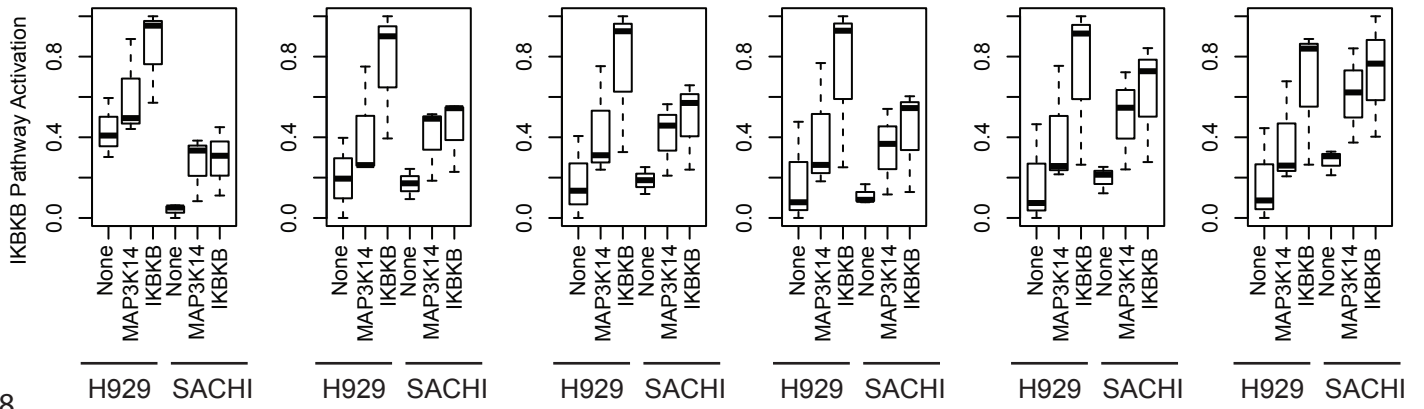

D. GSE9008

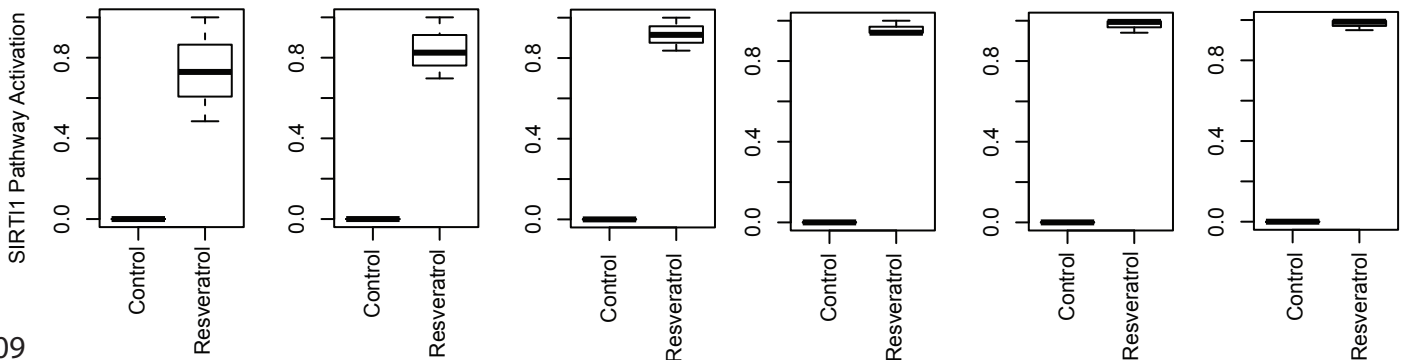

E. GSE13309

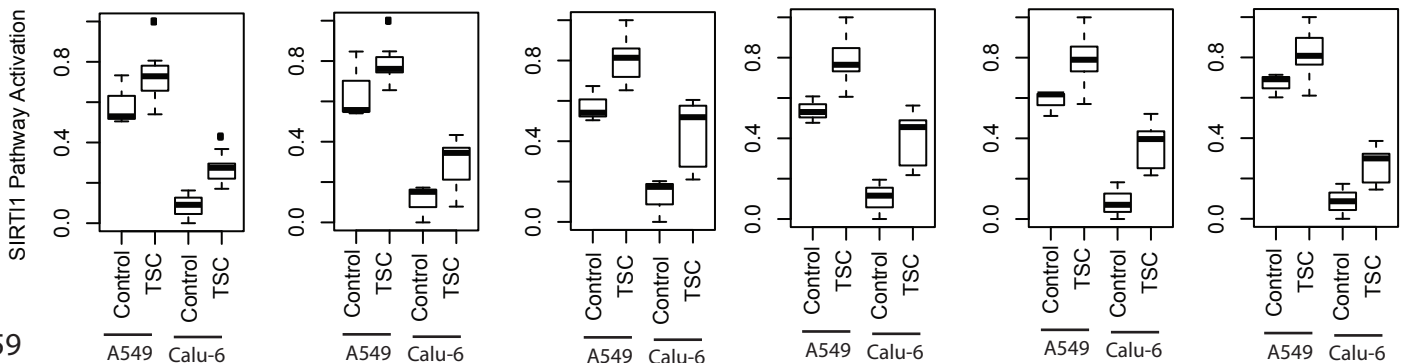

F. GSE13459

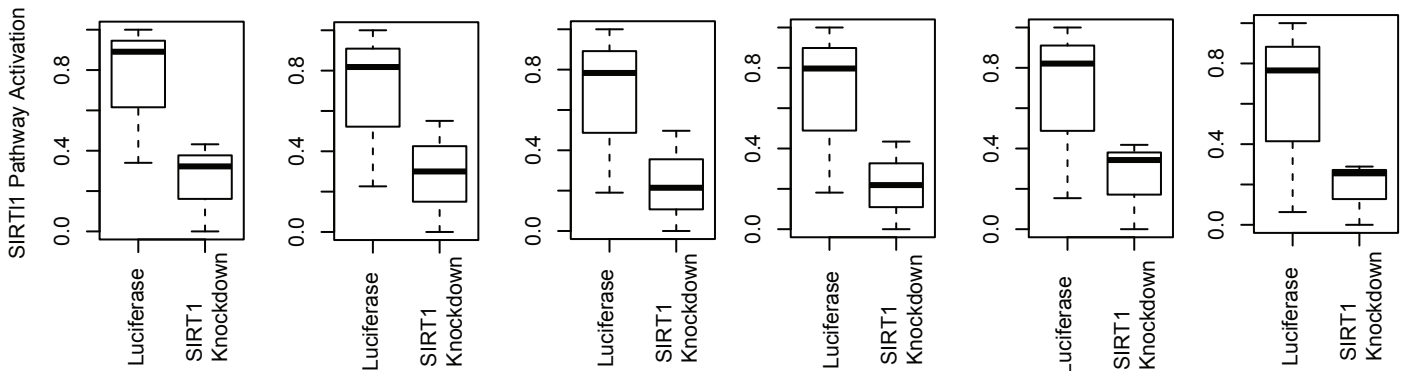

Supplement: NIHMS407329-supplement-5.pdf [file NIHMS407329-supplement-5.pdf]

Supplemental Figure 4

A

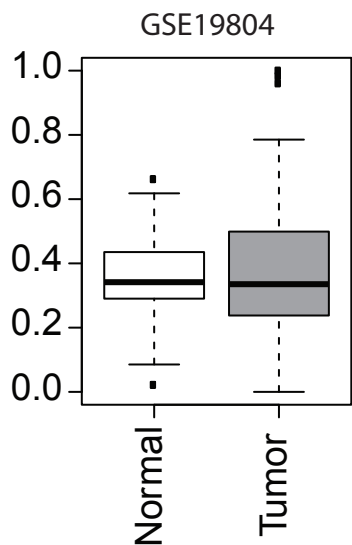

B

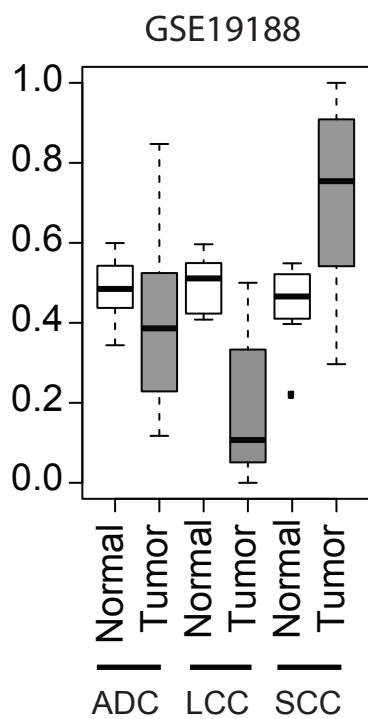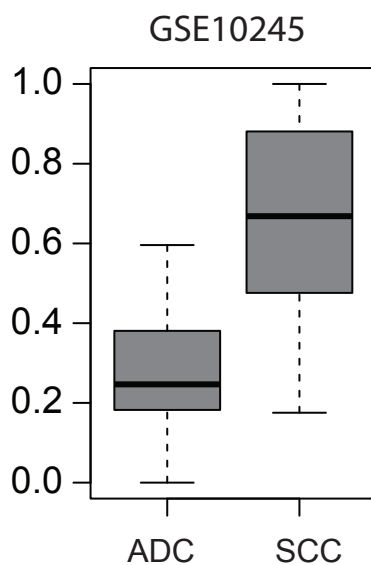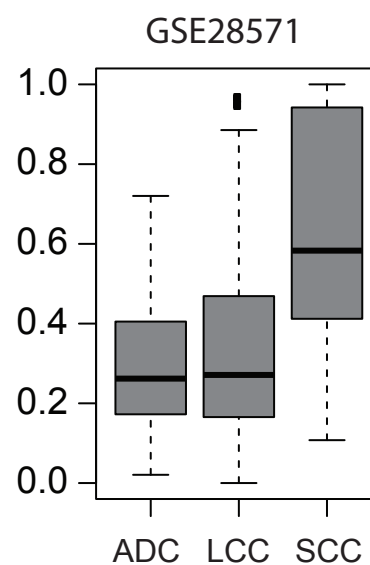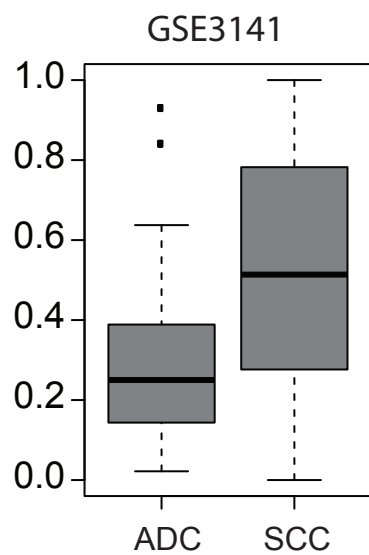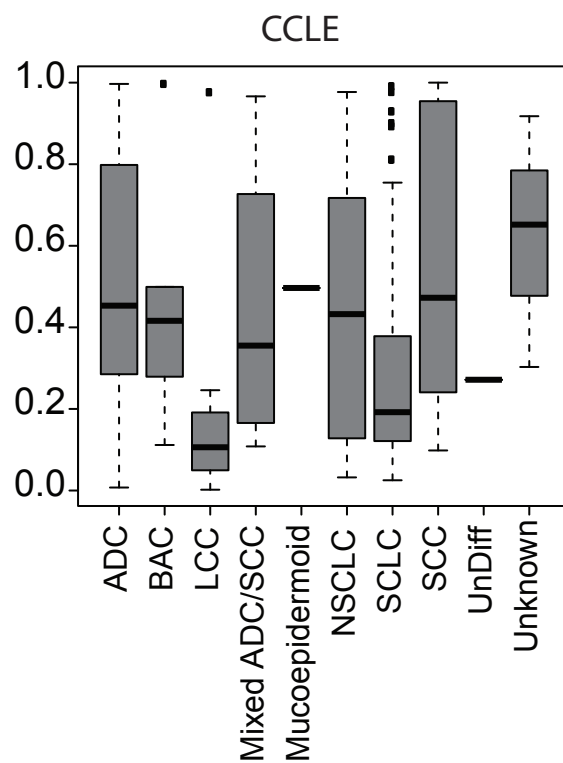

Supplement: NIHMS407329-supplement-6.pdf [file NIHMS407329-supplement-6.pdf]

Supplemental Figure 5

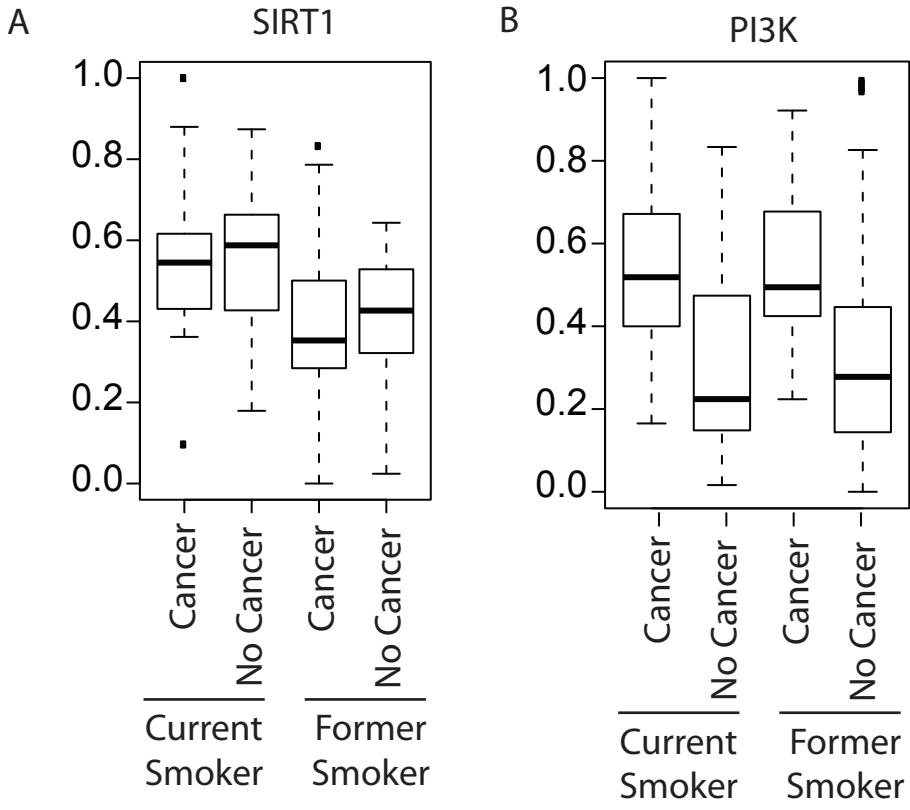

Supplement: NIHMS407329-supplement-7.pdf [file NIHMS407329-supplement-7.pdf]

Supplemental Figure 6

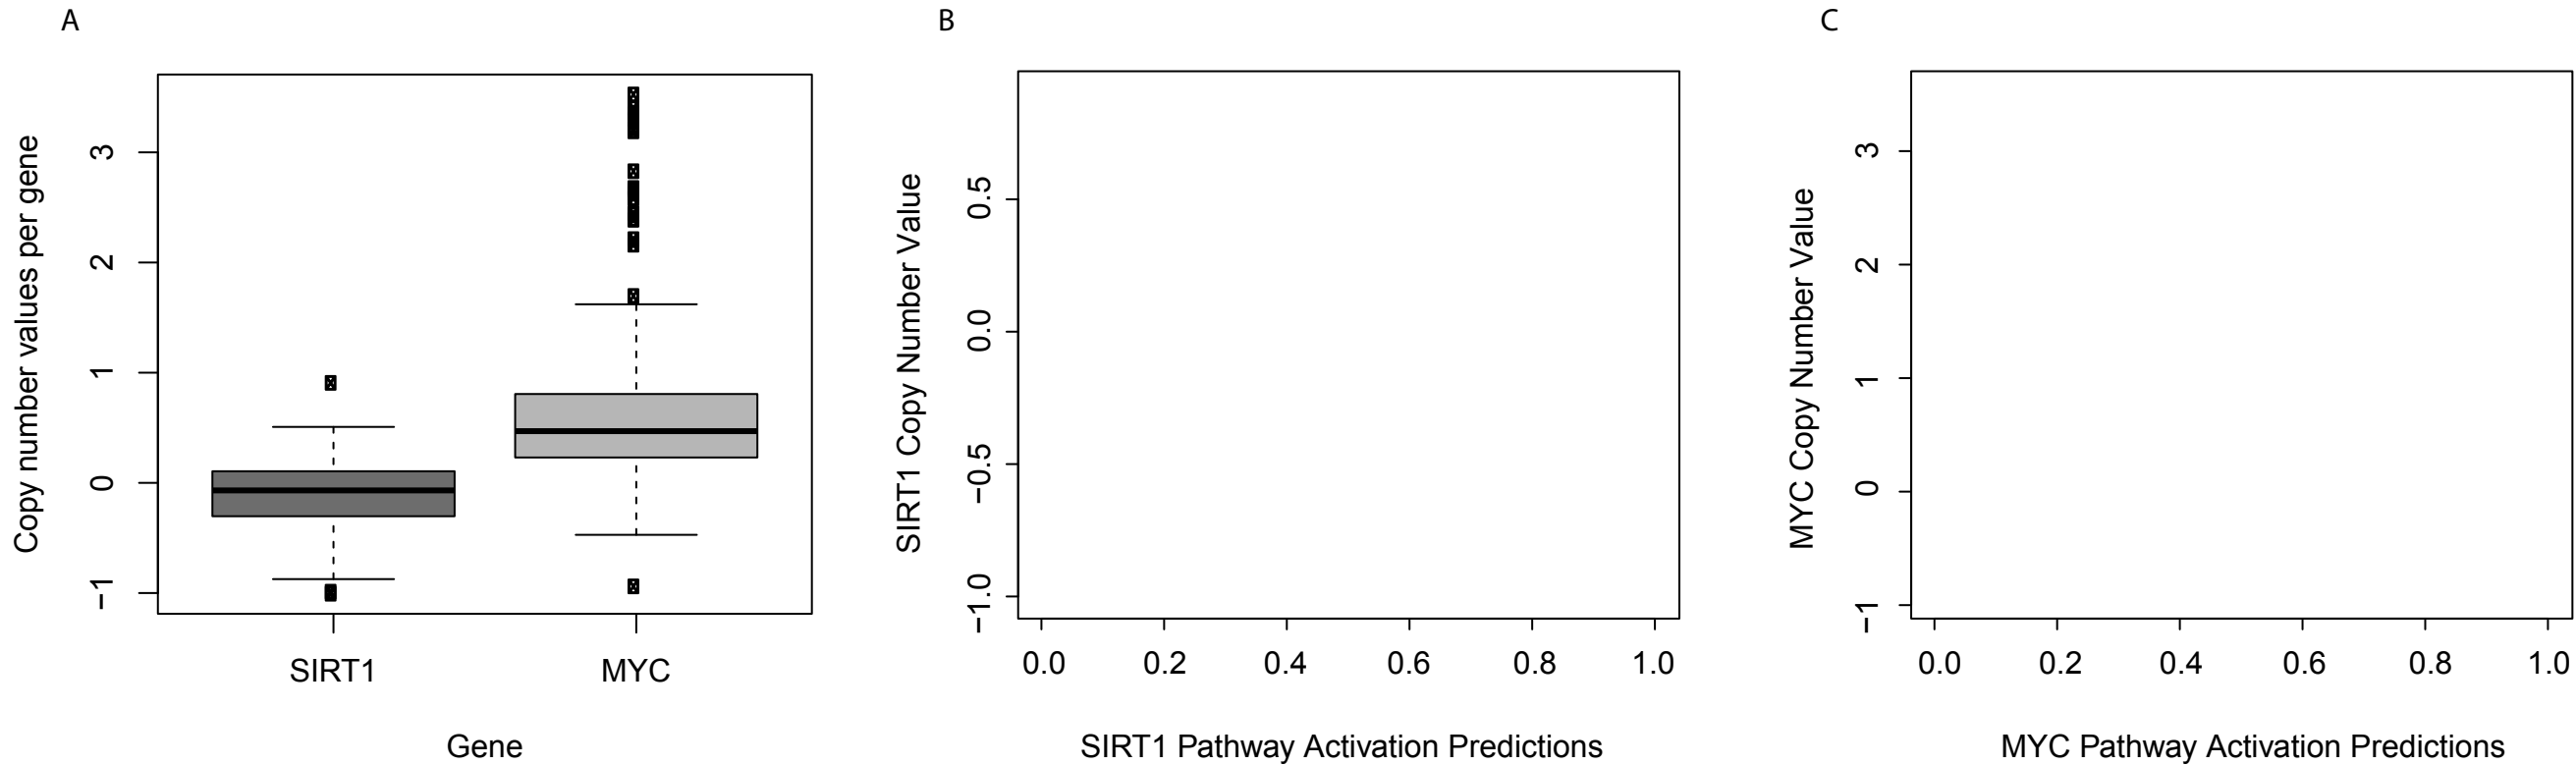

Supplement: NIHMS407329-supplement-8.pdf [file NIHMS407329-supplement-8.pdf]
